# Supplementary material for: Global Health Governance and Health Equity in the Context of COVID-19: A Scoping Review
Source: MDPI journal article supplement (doi:10.3390/healthcare10030540), 2022-03-15
Supplement: s1 [file s1]

The list of authors' names, study titles, and year of publication

| Title                                                                                                                                 | Author                                                                                                                                                                  | Year |
|---------------------------------------------------------------------------------------------------------------------------------------|-------------------------------------------------------------------------------------------------------------------------------------------------------------------------|------|
| The right to health must guide responses to COVID-19                                                                                  | Pūras, Dainius; de Mesquita, Judith Bueno; Cabal, Luisa; Maleche, Allan; Meier, Benjamin Mason                                                                          | 2020 |
| Policy opportunities to enhance sharing for pandemic research                                                                         | Rourke, Michelle; Eccleston-Turner, Mark; Phelan, Alexandra; Gostin, Lawrence                                                                                           | 2020 |
| Solidarity and universal preparedness for health after covid-19                                                                       | Tomson, Göran; Causevic, Sara; Ottersen, Ole Petter; Peterson, Stefan Swartling; Rashid, Sabina; Wanyenze, Rhoda Kitt; Yamin, Alicia Ely                                | 2021 |
| Digital Technology and the Political Determinants of Health Inequities: Special Issue Introduction                                    | Storeng, Katerini Tagmatarchi; Fukuda-Parr, Sakiko; Mahajan, Manjari; Venkatapuram, Sridhar                                                                             | 2021 |
| Covid-19 pandemic and the social determinants of health                                                                               | Paremoer, Lauren; Nandi, Sulakshana; Serag, Hani; Baum, Fran                                                                                                            | 2021 |
| Creating political will for action on health equity: practical lessons for public health policy actors                                | Baum, Fran; Townsend, Belinda; Fisher, Matthew; Browne-Yung, Kathryn; Freeman, Toby; Ziersch, Anna; Harris, Patrick; Friel, Sharon                                      | 2020 |
| COVID-19 and the moral imagination                                                                                                    | Patel, Mahomed Said; Phillips, Christine Beatrice                                                                                                                       | 2021 |
| Challenges to Global Health Governance from the International Trade in Organ Transplants: Time for a New Model?                       | Langran, Irene                                                                                                                                                          | 2021 |
| What lessons does the COVID-19 pandemic hold for global alcohol policy?                                                               | Leung, June Yue Yan; Yeung, Shiu Lun Au; Lam, Tai Hing; Casswell, Sally                                                                                                 | 2021 |
| Human rights and fair access to COVID-19 vaccines: the International AIDS Society–Lancet Commission on Health and Human Rights        | Beyrer, Chris; Allotey, Pascale; Amon, Joseph J.; Baral, Stefan D.; Bassett, Mary T.; Deacon, Harriet; Dean, Lorraine T.; Fan, Lilianne; Giacaman, Rita; Gomes, Carolyn | 2021 |
| Global health in a turbulence time: a commentary                                                                                      | Lee, Tsung-Ling                                                                                                                                                         | 2020 |
| Strengthening Global Health Security and Reforming the International Health Regulations: Making the World Safer From Future Pandemics | Blinken, Antony J.; Becerra, Xavier                                                                                                                                     | 2021 |
| We need people's WHO to solve vaccine inequity, and we need it now                                                                    | Kim, Hani                                                                                                                                                               | 2021 |
| Facilitating Access to a COVID-19 Vaccine through Global Health Law                                                                   | Health Law, Global                                                                                                                                                      | 2019 |
| Advancing human rights through global health governance                                                                               | Meier, Benjamin Mason; Cinà, Margherita Marianna; Gostin, Lawrence O.                                                                                                   | 2020 |

|                                                                                                                                                                                                                                                                                                                                                                                                    |                                                                                                                                                                                          |      |
|----------------------------------------------------------------------------------------------------------------------------------------------------------------------------------------------------------------------------------------------------------------------------------------------------------------------------------------------------------------------------------------------------|------------------------------------------------------------------------------------------------------------------------------------------------------------------------------------------|------|
| The Breathing Catastrophe: COVID-19 and Global Health Governance                                                                                                                                                                                                                                                                                                                                   | Dentico, Nicoletta                                                                                                                                                                       | 2021 |
| Building back fairer in public health policy requires collective action with and for the most vulnerable in society                                                                                                                                                                                                                                                                                | D'Ambruso, Lucia; Abbott, Pamela; Binagwaho, Agnes                                                                                                                                       | 2021 |
| Global health in low-income and middle-income countries: a framework for action                                                                                                                                                                                                                                                                                                                    | Olufadewa, Isaac; Adesina, Miracle; Ayorinde, Toluwase                                                                                                                                   | 2021 |
| Equity at a time of pandemic                                                                                                                                                                                                                                                                                                                                                                       | Plamondon, Katrina M.                                                                                                                                                                    | 2021 |
| COVID-19 vaccine equity: a health systems and policy perspective                                                                                                                                                                                                                                                                                                                                   | van de Pas, Remco; Widdowson, Marc-Alain; Ravinetto, Raffaella; NS, Prashanth; Ochoa, Theresa J.; Fofana, Thierno Oumar; Van Damme, Wim                                                  | 2021 |
| From Ebola to COVID-19: what explains institutionalized manias and the ultimate preference for non-optimal solutions in global health governance?                                                                                                                                                                                                                                                  | Ahen, Frederick                                                                                                                                                                          | 2021 |
| The Case for a Global Healthcare Partnership                                                                                                                                                                                                                                                                                                                                                       | Kher, Rajeev; Nair, Arun S.                                                                                                                                                              | 2020 |
| COVID-19, poverty and inclusive development                                                                                                                                                                                                                                                                                                                                                        | Gupta, Joyeeta; Bavinck, Maarten; Ros-Tonen, Mirjam; Asubonteng, Kwabena; Bosch, Hilmer; van Ewijk, Edith; Hordijk, Michaela; Van Leynseele, Yves; Cardozo, Mieke Lopes; Miedema, Esther | 2021 |
| In September 2020, the World Health Organization called for 'equitable access to COVID-19 tools' which included 'the development, production and equitable access to COVID-19 tests, treatments and vaccines globally, while strengthening health systems'. What evidence is there of inequity of access so far in this pandemic? What is the role of national governments and of the WHO in this? | Osborne, Rhiannon                                                                                                                                                                        | 2021 |
| Understanding geopolitical determinants of health                                                                                                                                                                                                                                                                                                                                                  | Persaud, Albert; Bhugra, Dinesh; Valsraj, Koravangattu; Bhavsar, Vishal                                                                                                                  | 2021 |
| Global Health Partnerships and Translation                                                                                                                                                                                                                                                                                                                                                         | Chattu, Vijay Kumar; Aslanyan, Garry                                                                                                                                                     | 2020 |
| Vaccine ethics: an ethical framework for global distribution of COVID-19 vaccines                                                                                                                                                                                                                                                                                                                  | Jecker, Nancy S.; Wightman, Aaron G.; Diekema, Douglas S.                                                                                                                                | 2021 |
| Risky business: COVAX and the financialization of global vaccine equity                                                                                                                                                                                                                                                                                                                            | Stein, Felix                                                                                                                                                                             | 2021 |
| WHO runs the world-(not) girls: gender neglect during global health emergencies                                                                                                                                                                                                                                                                                                                    | Wenham, Clare; Davies, Sara E.                                                                                                                                                           | 2021 |
| Governance and COVID-19: a background paper for the 2021 SDG 16 conference                                                                                                                                                                                                                                                                                                                         | Steven, A.; Williams, M.                                                                                                                                                                 | 2020 |
| The practice of evaluating epidemic response in humanitarian and low-income settings: a systematic review                                                                                                                                                                                                                                                                                          | Warsame, Abdihamid; Murray, Jillian; Gimma, Amy; Checchi, Francesco                                                                                                                      | 2020 |

|                                                                                                                                 |                                                                                                                                                                                                                                     |      |
|---------------------------------------------------------------------------------------------------------------------------------|-------------------------------------------------------------------------------------------------------------------------------------------------------------------------------------------------------------------------------------|------|
| We Cannot Win the Access to Medicines Struggle Using the Same Thinking That Causes the Chronic Access Crisis                    | Krikorian, Gaëlle; Torreele, Els                                                                                                                                                                                                    | 2021 |
| The legal determinants of health: harnessing the power of law for global health and sustainable development                     | Gostin, Lawrence O.; Monahan, John T.; Kaldor, Jenny; DeBartolo, Mary; Friedman, Eric A.; Gottschalk, Katie; Kim, Susan C.; Alwan, Ala; Binagwaho, Agnes; Burci, Gian Luca                                                          | 2019 |
| Imagining Global Health with Justice: Transformative Ideas for Health and Well-Being While Leaving No One Behind                | Gostin, Lawrence O.; Friedman, Eric A.                                                                                                                                                                                              | 2019 |
| Special Volume No. 1, 2021: The Global One Health Environment                                                                   | Abed, Yehia; Sahu, Monalisha; Ormea, Veronica; Mans, Linda; Lueddeke, George; Laaser, Ulrich; Hokama, Tomiko; Goletic, Rusmir; Eliakimu, Eliudi; Dobe, Madhumita                                                                    | 2021 |
| Development Trends and Assistance for Health                                                                                    | Zwi, Anthony B.                                                                                                                                                                                                                     | 2020 |
| Ethical, public health, and economic dimensions of the inequitable global distribution of COVID-19 vaccines                     | Pranav Tandon                                                                                                                                                                                                                       | 2021 |
| Public health and degrowth working synergistically: what leverage for public health                                             | Ouimet, M. O.; Turcotte, P. L.; Rainville, L. C.; Abraham, Y. M.; Kaiser, D.; Badillo-Amberg, I.                                                                                                                                    | 2021 |
| COVID-19 Trends Among Persons Aged 0–24 Years — United States, March 1–December 12, 2020<br>A Case Study of the First Year      | Sepúlveda, Jaime                                                                                                                                                                                                                    | 2021 |
| The Politics of Medicine: Power, Actors, and Ideas in the Making of Health                                                      | Winiarek, Claire Wulf                                                                                                                                                                                                               | 2021 |
| Fragmented health systems in COVID-19: rectifying the misalignment between global health security and universal health coverage | Lal, Arush; Erundu, Ngozi A.; Heymann, David L.; Gitahi, Githinji; Yates, Robert                                                                                                                                                    | 2021 |
| COVID-19 reveals weak health systems by design: Why we must re-make global health in this historic moment                       | Shamasunder, Sriram; Holmes, Seth M.; Goronga, Tinashe; Carrasco, Hector; Katz, Elyse; Frankfurter, Raphael; Keshavjee, Salmaan                                                                                                     | 2020 |
| Global public health security and justice for vaccines and therapeutics in the COVID-19 pandemic.                               | Hotez PJ, Batista C, Amor YB, Ergonul O, Figueroa JP, Gilbert S, Gursel M, Hassanain M, Kang G, Kaslow DC, Kim JH, Lall B, Larson H, Naniche D, Sheahan T, Shoham S, Wilder-Smith A, Sow SO, Strub-Wourgaft N, Yadav P, Bottazzi ME | 2021 |
| The construction and reconstruction of global health governance system under public health emergencies                          | Lou, L.; Wei, Y.; Wei, X.                                                                                                                                                                                                           | 2020 |

|                                                                                     |                                                                                                                       |      |
|-------------------------------------------------------------------------------------|-----------------------------------------------------------------------------------------------------------------------|------|
| COVID-19 and future pandemics: a global systems approach and relevance to SDGs      | Thoradeniya, Tharanga; Jayasinghe, Saroj                                                                              | 2021 |
| The World Health Organization in Global Health Law                                  | Meier, Benjamin Mason; Taylor, Allyn; Eccleston-Turner, Mark; Habibi, Roojin; Sekalala, Sharifah; Gostin, Lawrence O. | 2020 |
| Rethinking the central role of equity in the global governance of pandemic response | Eyawo, Oghenowede; Viens, A. M.                                                                                       | 2020 |
| COVAX and the rise of the 'super public private partnership' for global health      | Storeng, K.T., de Bengy Puyvallée, A., Stein, F.                                                                      | 2021 |
| THE URGENCY OF MUTUAL COLLECTIVE ACCOUNTABILITY IN GLOBAL HEALTH GOVERNANCE.        | Kohler, J. C.                                                                                                         | 2021 |
